# Supplementary material for: Innovative Application of Phytochemicals from Fermented Legumes and Spices/Herbs Added in Extruded Snacks
Source: MDPI journal article supplement (doi:10.3390/nu13124538), 2021-12-17
Supplement: s1 [file s1]

**Table S1. Phenolic compounds of herbs/spices added to extruded snacks.**

| Raw materials | Phenolic compounds [mg/100g d.m.] |                         |                       |                        |                       |                         |                         |        |                        |        |
|---------------|-----------------------------------|-------------------------|-----------------------|------------------------|-----------------------|-------------------------|-------------------------|--------|------------------------|--------|
|               | NCA                               | CA                      | p-CA                  | FA                     | MYR                   | QUE                     | LUT                     | KEMP   | API                    | Total  |
| Lovage        | 16,4±2,6 <sup>b</sup>             | 181,4±24,1 <sup>c</sup> | 27,6±1,2 <sup>c</sup> | 123,2±3,3 <sup>d</sup> | 4,3±0,1 <sup>a</sup>  | 588,6±57,2 <sup>b</sup> | nd                      | 59±4,8 | nd                     | 1000,5 |
| Basil         | 4,06±0,9 <sup>a</sup>             | 174,2±9,2 <sup>c</sup>  | 28,6±0,8 <sup>c</sup> | 22,05±2,6 <sup>b</sup> | 10,9±0,6 <sup>b</sup> | 4,2±0,2 <sup>a</sup>    | 11,7±2,7 <sup>a</sup>   | nd     | 15,7±0,6 <sup>a</sup>  | 271,4  |
| Oregano       | 4,11±0,5 <sup>a</sup>             | 60,3±0,7 <sup>b</sup>   | 18,4±0,9 <sup>b</sup> | 8,5±0,5 <sup>a</sup>   | nd                    | nd                      | 363,3±25,1 <sup>c</sup> | nd     | 37,2±2,5 <sup>c</sup>  | 491,8  |
| Thyme         | nd                                | 12,06±0,5 <sup>a</sup>  | 11,4±0,6 <sup>a</sup> | 26,03±0,6 <sup>c</sup> | nd                    | nd                      | 202,3±0,1 <sup>b</sup>  | nd     | 28,06±1,4 <sup>b</sup> | 279,85 |

NCA – neochlorogenic acid, CA - caffeic acid, p-CA -p-coumaric acid, FA – ferulic acid, MYR – myricetin, QUE – quercetin, LUT – luteolin, KEMP – kaempferol, API – apigenin; nd – not detected

It was according to the methodology: Wojdyło, A.; Oszmiański, J.; Czemerys, R. Antioxidant activity and phenolic compounds in 32 selected herbs. Food Chemistry, 2007,105, 940-949.

**Table S2.** Mean scores of consumer desirability of extruded snacks with fermented broad bean or bean and herb/spices, and the control sample (without herb/spices addition).

|                       |         | Desirability          |                       |                       |                       |                       |
|-----------------------|---------|-----------------------|-----------------------|-----------------------|-----------------------|-----------------------|
|                       |         | aroma                 | colour                | taste                 | texture               | overall               |
| broad bean<br>grinded | Control | 5.21±0.9 <sup>a</sup> | 6.51±0.8 <sup>a</sup> | 4.49±1.0 <sup>a</sup> | 7.25±0.7 <sup>a</sup> | 4.49±1.1 <sup>a</sup> |
|                       | Thyme   | 4.96±1.2 <sup>a</sup> | 6.11±0.9 <sup>a</sup> | 4.58±0.9 <sup>a</sup> | 7.15±0.5 <sup>a</sup> | 4.58±0.9 <sup>a</sup> |
|                       | Oregano | 4.93±1.3 <sup>a</sup> | 6.27±0.7 <sup>a</sup> | 4.93±0.8 <sup>a</sup> | 7.19±0.9 <sup>a</sup> | 4.93±1.0 <sup>a</sup> |
|                       | Basil   | 5.78±1.1 <sup>a</sup> | 6.18±0.8 <sup>a</sup> | 4.05±1.0 <sup>a</sup> | 7.16±1.0 <sup>a</sup> | 4.04±1.0 <sup>a</sup> |
|                       | Lovage  | 4.96±1.2 <sup>a</sup> | 6.26±1.1 <sup>a</sup> | 7.98±0.7 <sup>b</sup> | 7.16±1.1 <sup>a</sup> | 7.92±0.8 <sup>b</sup> |
| broad bean husk       | Control | 3.80±0.8 <sup>a</sup> | 5.50±0.9 <sup>a</sup> | 4.15±0.9 <sup>a</sup> | 7.09±0.9 <sup>a</sup> | 4.15±1.1 <sup>a</sup> |
|                       | Thyme   | 4.72±1.1 <sup>a</sup> | 5.70±0.9 <sup>a</sup> | 4.25±0.8 <sup>a</sup> | 7.01±0.7 <sup>a</sup> | 4.25±1.2 <sup>a</sup> |
|                       | Oregano | 4.74±1.0 <sup>a</sup> | 5.74±0.7 <sup>a</sup> | 4.62±0.9 <sup>a</sup> | 7.06±0.7 <sup>a</sup> | 4.59±1.0 <sup>a</sup> |
|                       | Basil   | 5.32±1.1 <sup>a</sup> | 5.79±1.2 <sup>a</sup> | 4.01±1.1 <sup>a</sup> | 7.03±0.8 <sup>a</sup> | 3.99±1.3 <sup>a</sup> |
|                       | Lovage  | 4.85±1.2 <sup>a</sup> | 5.85±1.2 <sup>a</sup> | 7.55±0.9 <sup>b</sup> | 7.03±1.1 <sup>a</sup> | 7.75±0.7 <sup>b</sup> |
| bean e grinded        | Control | 4.15±0.8 <sup>a</sup> | 5.50±1.0 <sup>a</sup> | 4.53±1.0 <sup>a</sup> | 7.09±1.0 <sup>a</sup> | 4.53±1.0 <sup>a</sup> |
|                       | Thyme   | 4.72±1.1 <sup>a</sup> | 5.70±1.1 <sup>a</sup> | 4.35±0.9 <sup>a</sup> | 7.01±1.1 <sup>a</sup> | 4.35±1.1 <sup>a</sup> |
|                       | Oregano | 4.75±1.1 <sup>a</sup> | 5.74±1.2 <sup>a</sup> | 4.72±1.2 <sup>a</sup> | 7.06±0.9 <sup>a</sup> | 4.72±1.0 <sup>a</sup> |
|                       | Basil   | 5.33±1.2 <sup>a</sup> | 5.79±1.0 <sup>a</sup> | 3.75±0.9 <sup>a</sup> | 7.03±1.2 <sup>a</sup> | 3.90±0.9 <sup>a</sup> |
|                       | Lovage  | 4.85±1.1 <sup>a</sup> | 5.85±1.2 <sup>a</sup> | 7.75±1.0 <sup>b</sup> | 7.03±1.1 <sup>a</sup> | 7.95±0.8 <sup>b</sup> |
| bean husk             | Control | 3.93±0.9 <sup>a</sup> | 4.82±1.2 <sup>a</sup> | 4.29±0.9 <sup>a</sup> | 6.93±0.9 <sup>a</sup> | 4.29±0.9 <sup>a</sup> |
|                       | Thyme   | 4.68±1.3 <sup>a</sup> | 5.65±1.3 <sup>a</sup> | 4.21±1.1 <sup>a</sup> | 6.90±1.0 <sup>a</sup> | 4.12±1.1 <sup>a</sup> |
|                       | Oregano | 4.67±1.2 <sup>a</sup> | 5.69±0.9 <sup>a</sup> | 4.61±1.0 <sup>a</sup> | 6.95±1.1 <sup>a</sup> | 4.43±1.0 <sup>a</sup> |
|                       | Basil   | 5.45±1.0 <sup>a</sup> | 5.73±0.9 <sup>a</sup> | 4.03±0.9 <sup>a</sup> | 6.93±0.9 <sup>a</sup> | 4.06±1.1 <sup>a</sup> |
|                       | Lovage  | 4.55±1.1 <sup>a</sup> | 5.80±0.9 <sup>a</sup> | 7.68±0.7 <sup>b</sup> | 6.93±1.1 <sup>a</sup> | 7.68±0.8 <sup>b</sup> |

\* Different letters within the same column represent significant differences (n=380 ), at a  $\alpha \leq 0.05$

**Table S3.** Mean scores (n=17) of sensory taste and aroma profiling of extruded snacks with fermented broad bean or bean and herb/spices, and the control sample (without herb/spices addition).

| Sample                       |         | Descriptors        |                    |                    |                    |                    |                    |                    |                    |                    |                    |                    |                    |                    |                    |                    |                    |
|------------------------------|---------|--------------------|--------------------|--------------------|--------------------|--------------------|--------------------|--------------------|--------------------|--------------------|--------------------|--------------------|--------------------|--------------------|--------------------|--------------------|--------------------|
|                              |         | aroma              | taste              |                    |                    |                    |                    |                    |                    |                    |                    |                    |                    |                    |                    |                    |                    |
|                              |         | essential oil      | herbal             | starch             | lemon              | bitter             | strange            | sour               | broth              | essential oil      | herbal             | sour               | starch             | salty              | broth              | bitter             | strange            |
| Fermented broad bean grinded | Control | 0.25 <sup>a*</sup> | 3.25 <sup>cb</sup> | 0.00 <sup>a</sup>  | 3.00 <sup>c</sup>  | 2.00 <sup>b</sup>  | 3.25 <sup>cb</sup> | 0.00 <sup>a</sup>  | 0.85 <sup>a</sup>  | 0.55 <sup>a</sup>  | 0.55 <sup>a</sup>  | 1.00 <sup>ba</sup> | 3.00 <sup>ba</sup> | 1.12 <sup>a</sup>  | 0.00 <sup>a</sup>  | 2.50 <sup>cb</sup> | 3.00               |
|                              | Thyme   | 1.50 <sup>cb</sup> | 3.40 <sup>c</sup>  | 1.00 <sup>cb</sup> | 3.20 <sup>dc</sup> | 0.85 <sup>ba</sup> | 0.00 <sup>a</sup>  | 0.30 <sup>ba</sup> | 1.30 <sup>ba</sup> | 1.00 <sup>ba</sup> | 1.00 <sup>ba</sup> | 0.50 <sup>a</sup>  | 3.50 <sup>ba</sup> | 1.65 <sup>ba</sup> | 0.00 <sup>a</sup>  | 3.50 <sup>dc</sup> | 1.75 <sup>ba</sup> |
|                              | Oregano | 3.00 <sup>dc</sup> | 2.50 <sup>b</sup>  | 1.25 <sup>c</sup>  | 2.25 <sup>cb</sup> | 0.85 <sup>ba</sup> | 0.00 <sup>a</sup>  | 0.25 <sup>ba</sup> | 1.85 <sup>b</sup>  | 1.80 <sup>b</sup>  | 1.80 <sup>b</sup>  | 0.45 <sup>a</sup>  | 3.00 <sup>ba</sup> | 2.01 <sup>ba</sup> | 0.00 <sup>a</sup>  | 1.75 <sup>ba</sup> | 1.50 <sup>ba</sup> |
|                              | Basil   | 1.00 <sup>b</sup>  | 1.80 <sup>ba</sup> | 1.00 <sup>cb</sup> | 1.95 <sup>ba</sup> | 0.80 <sup>ba</sup> | 0.00 <sup>a</sup>  | 0.25 <sup>ba</sup> | 1.25 <sup>a</sup>  | 0.85 <sup>ba</sup> | 0.85 <sup>ba</sup> | 0.75 <sup>ba</sup> | 2.50 <sup>a</sup>  | 2.00 <sup>ba</sup> | 0.75 <sup>b</sup>  | 4.50 <sup>d</sup>  | 2.25 <sup>b</sup>  |
|                              | Lovage  | 1.00 <sup>b</sup>  | 1.20 <sup>a</sup>  | 0.75 <sup>b</sup>  | 0.75 <sup>a</sup>  | 0.85 <sup>ba</sup> | 0.50 <sup>ba</sup> | 1.95 <sup>c</sup>  | 1.00 <sup>a</sup>  | 0.85 <sup>ba</sup> | 0.85 <sup>ba</sup> | 0.75 <sup>ba</sup> | 4.00 <sup>ba</sup> | 2.50 <sup>ba</sup> | 4.50 <sup>c</sup>  | 0.75 <sup>a</sup>  | 0.75 <sup>a</sup>  |
| Fermented broad bean husk    | Control | 0.00 <sup>a</sup>  | 3.00 <sup>cb</sup> | 0.50 <sup>b</sup>  | 4.00 <sup>d</sup>  | 3.95 <sup>c</sup>  | 2.85 <sup>cb</sup> | 0.00 <sup>ba</sup> | 0.95 <sup>a</sup>  | 0.25 <sup>a</sup>  | 0.25 <sup>a</sup>  | 1.15 <sup>b</sup>  | 4.05 <sup>ba</sup> | 1.25 <sup>ba</sup> | 0.00 <sup>a</sup>  | 4.75 <sup>d</sup>  | 3.50               |
|                              | Thyme   | 1.85 <sup>cb</sup> | 3.00 <sup>cb</sup> | 1.00 <sup>cb</sup> | 2.45 <sup>cb</sup> | 1.25 <sup>ba</sup> | 0.00 <sup>a</sup>  | 0.25 <sup>ba</sup> | 1.25 <sup>ba</sup> | 1.25 <sup>ba</sup> | 1.25 <sup>b</sup>  | 0.50 <sup>a</sup>  | 3.50 <sup>ba</sup> | 1.85 <sup>ba</sup> | 0.00 <sup>a</sup>  | 3.75 <sup>dc</sup> | 1.50 <sup>ba</sup> |
|                              | Oregano | 3.10 <sup>dc</sup> | 2.25 <sup>ba</sup> | 1.25 <sup>c</sup>  | 2.00 <sup>b</sup>  | 0.55 <sup>a</sup>  | 0.00 <sup>a</sup>  | 0.25 <sup>ba</sup> | 2.25 <sup>b</sup>  | 2.00 <sup>b</sup>  | 2.00 <sup>b</sup>  | 0.45 <sup>a</sup>  | 3.00 <sup>ba</sup> | 2.12 <sup>ba</sup> | 0.00 <sup>a</sup>  | 1.50 <sup>ba</sup> | 1.80 <sup>ba</sup> |
|                              | Basil   | 1.25 <sup>b</sup>  | 2.00 <sup>ba</sup> | 1.00 <sup>c</sup>  | 2.50 <sup>cb</sup> | 0.80 <sup>ba</sup> | 0.00 <sup>a</sup>  | 0.25 <sup>ba</sup> | 1.00 <sup>a</sup>  | 0.75 <sup>ba</sup> | 0.75 <sup>ba</sup> | 0.75 <sup>ba</sup> | 2.50 <sup>a</sup>  | 1.98 <sup>ba</sup> | 0.50 <sup>b</sup>  | 4.25 <sup>d</sup>  | 2.00 <sup>b</sup>  |
|                              | Lovage  | 0.85 <sup>ba</sup> | 1.25 <sup>a</sup>  | 0.75 <sup>b</sup>  | 0.80 <sup>a</sup>  | 0.70 <sup>a</sup>  | 0.65 <sup>ba</sup> | 1.25 <sup>cb</sup> | 1.25 <sup>ba</sup> | 0.70 <sup>a</sup>  | 0.70 <sup>ba</sup> | 0.85 <sup>ba</sup> | 4.50 <sup>b</sup>  | 2.62 <sup>a</sup>  | 3.50 <sup>c</sup>  | 0.80 <sup>a</sup>  | 0.80 <sup>a</sup>  |
| Fermented bean grinded       | Control | 0.30 <sup>a</sup>  | 3.25 <sup>cb</sup> | 0.00 <sup>a</sup>  | 3.00 <sup>c</sup>  | 1.00 <sup>ba</sup> | 3.25 <sup>cb</sup> | 0.00 <sup>ba</sup> | 0.75 <sup>a</sup>  | 0.40 <sup>a</sup>  | 0.40 <sup>a</sup>  | 1.75 <sup>b</sup>  | 3.00 <sup>ba</sup> | 1.20 <sup>ba</sup> | 0.00 <sup>a</sup>  | 3.00 <sup>a</sup>  | 1.75 <sup>ba</sup> |
|                              | Thyme   | 1.75 <sup>cb</sup> | 3.25 <sup>cb</sup> | 0.80 <sup>cb</sup> | 3.25 <sup>c</sup>  | 1.00 <sup>ba</sup> | 0.00 <sup>a</sup>  | 0.25 <sup>ba</sup> | 1.00 <sup>a</sup>  | 1.00 <sup>ba</sup> | 1.00 <sup>ba</sup> | 0.75 <sup>ba</sup> | 3.45 <sup>ba</sup> | 1.80 <sup>ba</sup> | 0.00 <sup>a</sup>  | 3.25 <sup>dc</sup> | 1.50 <sup>ba</sup> |
|                              | Oregano | 3.25               | 2.50 <sup>b</sup>  | 1.20               | 2.00 <sup>b</sup>  | 0.85 <sup>ba</sup> | 0.00 <sup>a</sup>  | 0.25 <sup>ba</sup> | 1.75 <sup>ba</sup> | 1.50 <sup>b</sup>  | 1.50 <sup>b</sup>  | 0.50 <sup>a</sup>  | 2.95 <sup>ba</sup> | 2.25 <sup>ba</sup> | 0.20 <sup>ba</sup> | 1.75 <sup>ba</sup> | 1.25 <sup>ba</sup> |
|                              | Basil   | 0.85 <sup>ba</sup> | 1.85 <sup>ba</sup> | 0.85 <sup>cb</sup> | 1.50 <sup>ba</sup> | 0.60 <sup>a</sup>  | 0.00 <sup>a</sup>  | 0.35 <sup>ba</sup> | 1.10 <sup>a</sup>  | 0.90 <sup>ba</sup> | 0.90 <sup>ba</sup> | 0.80 <sup>ba</sup> | 2.45 <sup>a</sup>  | 1.85 <sup>ba</sup> | 0.75 <sup>b</sup>  | 4.00 <sup>d</sup>  | 2.20 <sup>b</sup>  |
|                              | Lovage  | 0.75 <sup>ba</sup> | 1.35 <sup>a</sup>  | 0.70 <sup>b</sup>  | 0.75 <sup>a</sup>  | 0.80 <sup>ba</sup> | 0.75 <sup>b</sup>  | 2.25 <sup>c</sup>  | 0.85 <sup>a</sup>  | 0.85 <sup>ba</sup> | 0.85 <sup>ba</sup> | 0.75 <sup>ba</sup> | 4.30 <sup>ba</sup> | 2.59 <sup>b</sup>  | 3.90 <sup>c</sup>  | 0.80 <sup>a</sup>  | 0.80 <sup>a</sup>  |
| Fermented bean husk          | Control | 0.00 <sup>a</sup>  | 3.50 <sup>c</sup>  | 0.25 <sup>b</sup>  | 4.00 <sup>d</sup>  | 3.95 <sup>c</sup>  | 2.85 <sup>b</sup>  | 0.00 <sup>ba</sup> | 0.95 <sup>a</sup>  | 0.25 <sup>a</sup>  | 0.25 <sup>a</sup>  | 1.00 <sup>ba</sup> | 3.75 <sup>ba</sup> | 1.40 <sup>ba</sup> | 0.00 <sup>a</sup>  | 3.25 <sup>dc</sup> | 3.25 <sup>a</sup>  |
|                              | Thyme   | 1.85 <sup>cb</sup> | 3.25 <sup>cb</sup> | 0.80 <sup>cb</sup> | 2.45 <sup>cb</sup> | 1.25 <sup>ba</sup> | 0.00 <sup>a</sup>  | 0.25 <sup>ba</sup> | 1.30 <sup>a</sup>  | 1.25 <sup>ba</sup> | 1.25 <sup>b</sup>  | 0.65 <sup>a</sup>  | 3.25 <sup>ba</sup> | 1.56 <sup>ba</sup> | 0.00 <sup>a</sup>  | 3.50 <sup>dc</sup> | 1.75 <sup>b</sup>  |
|                              | Oregano | 3.10 <sup>dc</sup> | 2.84               | 1.20               | 2.00 <sup>b</sup>  | 0.55 <sup>a</sup>  | 0.00 <sup>a</sup>  | 0.25 <sup>ba</sup> | 2.25 <sup>b</sup>  | 2.00 <sup>b</sup>  | 2.00 <sup>b</sup>  | 0.45 <sup>a</sup>  | 3.25 <sup>ba</sup> | 2.30 <sup>ba</sup> | 0.00 <sup>a</sup>  | 1.50 <sup>ba</sup> | 1.80 <sup>b</sup>  |
|                              | Basil   | 1.25 <sup>b</sup>  | 2.00 <sup>ba</sup> | 0.85 <sup>cb</sup> | 2.50 <sup>cb</sup> | 0.80 <sup>ba</sup> | 0.00 <sup>a</sup>  | 0.25 <sup>ba</sup> | 1.00 <sup>a</sup>  | 0.75 <sup>ba</sup> | 0.75 <sup>ba</sup> | 0.75 <sup>ba</sup> | 2.50 <sup>a</sup>  | 1.99 <sup>ba</sup> | 0.50 <sup>ba</sup> | 4.25 <sup>d</sup>  | 2.00 <sup>b</sup>  |
|                              | Lovage  | 0.85 <sup>ba</sup> | 1.25 <sup>a</sup>  | 0.50 <sup>b</sup>  | 0.80 <sup>a</sup>  | 0.70 <sup>a</sup>  | 0.65 <sup>b</sup>  | 1.25 <sup>cb</sup> | 1.25 <sup>a</sup>  | 0.85 <sup>ba</sup> | 0.85 <sup>ba</sup> | 0.85 <sup>ba</sup> | 4.50 <sup>ba</sup> | 2.95 <sup>b</sup>  | 3.50 <sup>c</sup>  | 0.80 <sup>a</sup>  | 0.80 <sup>a</sup>  |

\*Different letters within the same column represent significant differences (n=17 ), at a  $\alpha \leq 0.05$
